# Supplementary material
Source: MDPI journal article supplement (https://www.mdpi.com/2072-4292/14/18/4429)
Supplement: s1 [file s1]

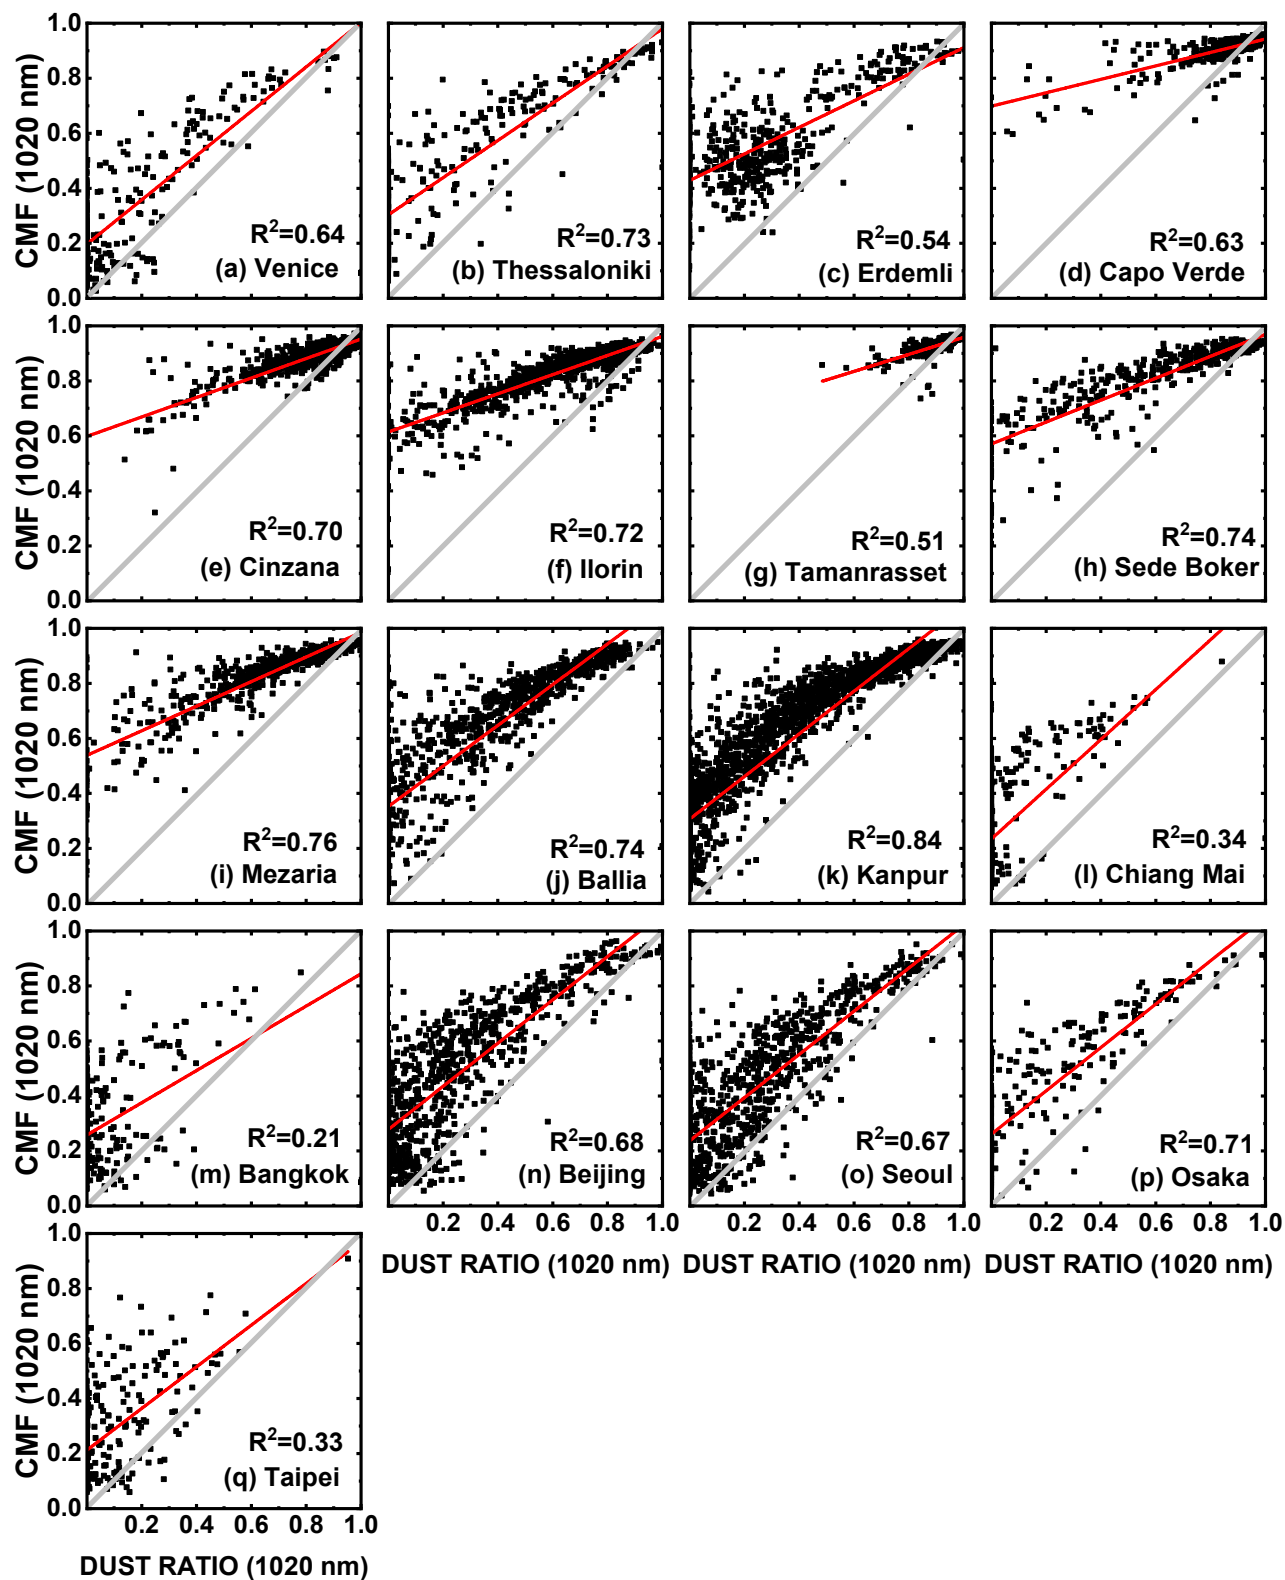

Figure S1. Correlation coefficient,  $R^2$  between dust ratio ( $R_D$ ) at wavelength 1020 nm and coarse mode fraction of the particle size distributions for each of the AERONET sites.

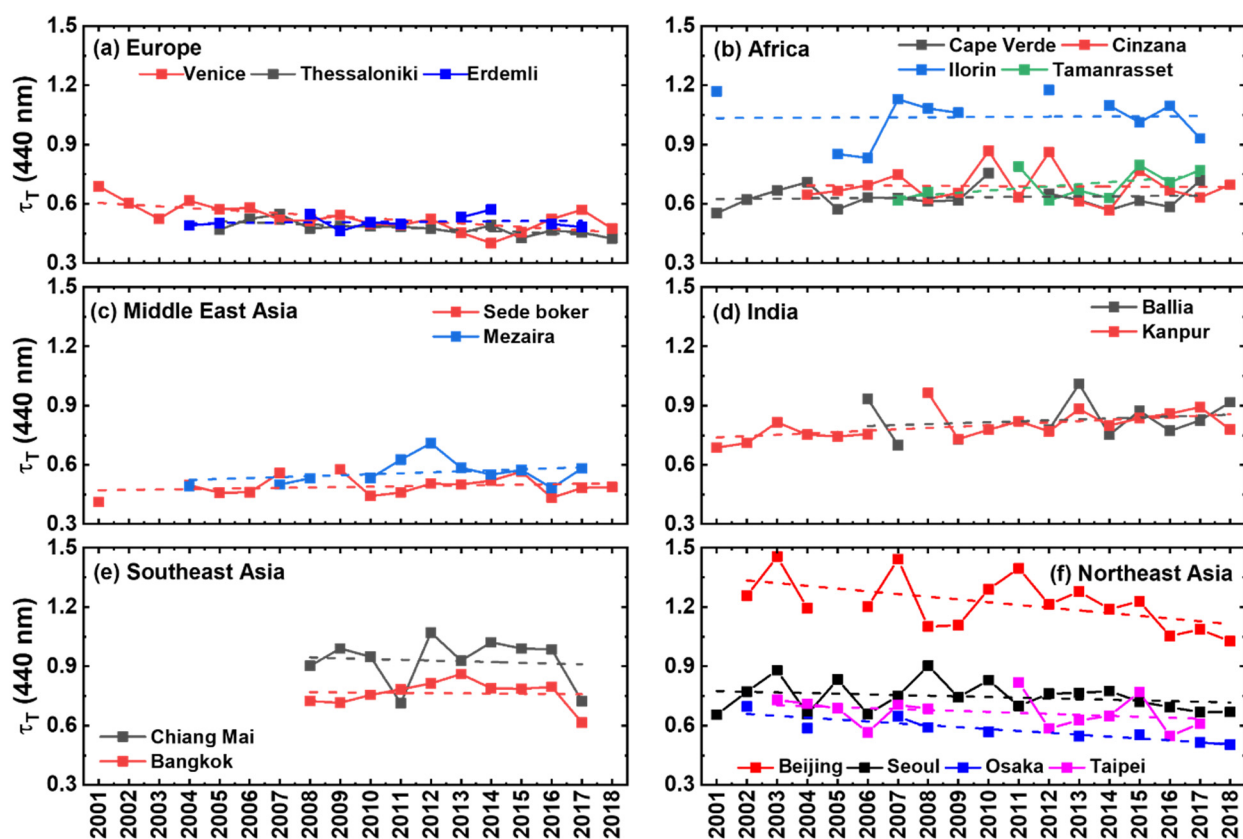

Figure S2. Annual trend of total AOD ( $\tau_T$ ) at wavelength 440 nm for the 17 AERONET sites for the timeframe from 2001–2018. The dashed lines show ordinary least square regression lines.

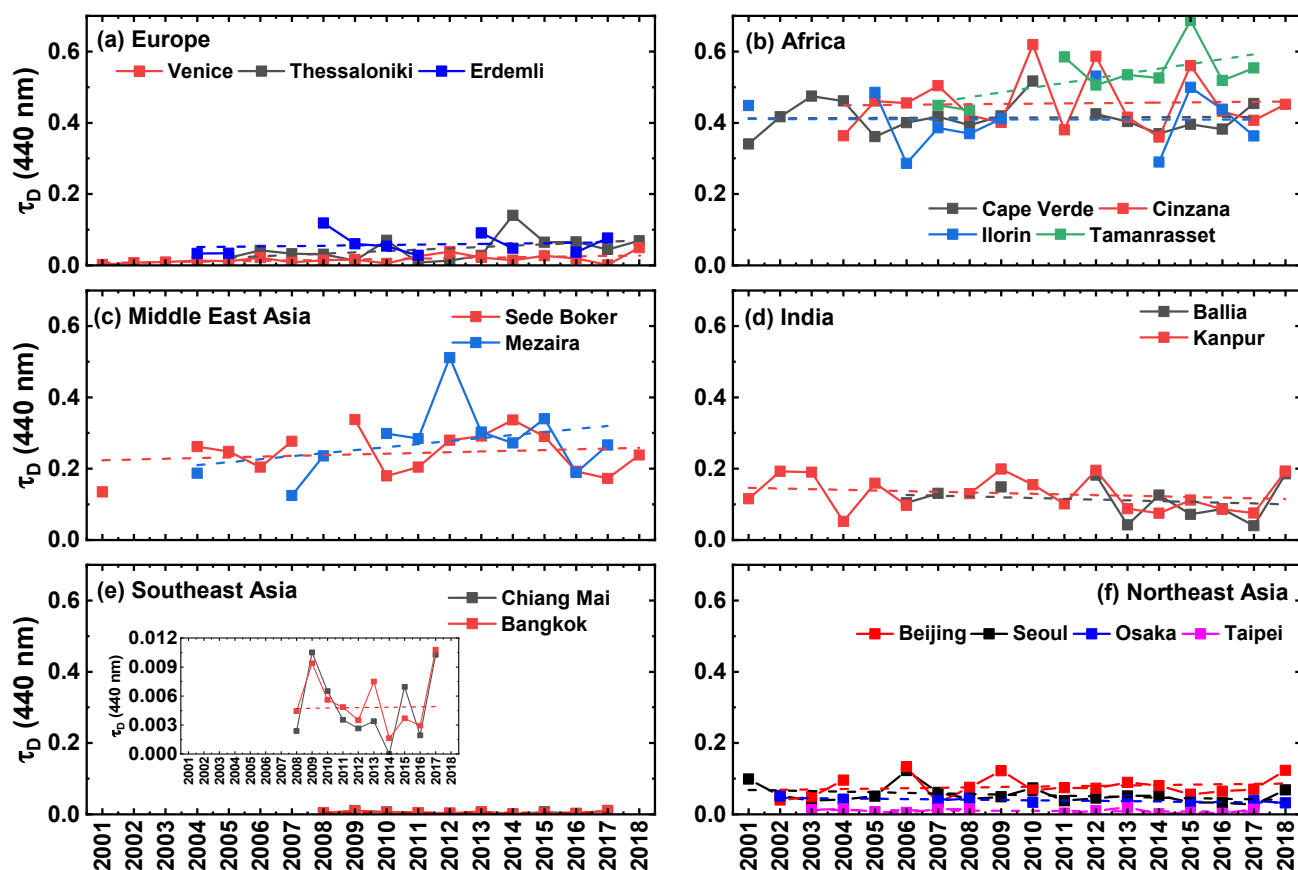

Figure S3. Annual trend of dust-only AOD ( $\tau_D$ ) at wavelength 440 nm for the 17 AERONET sites for the timeframe from 2001–2018. The dashed lines show ordinary least square regression lines.

**Figure S4.** Annual trend of coarse-mode pollution AOD ( $\tau_{PC}$ ) at wavelength 440 nm for the 17 AERONET sites for the timeframe from 2001–2018. The dashed lines show ordinary least square regression lines.

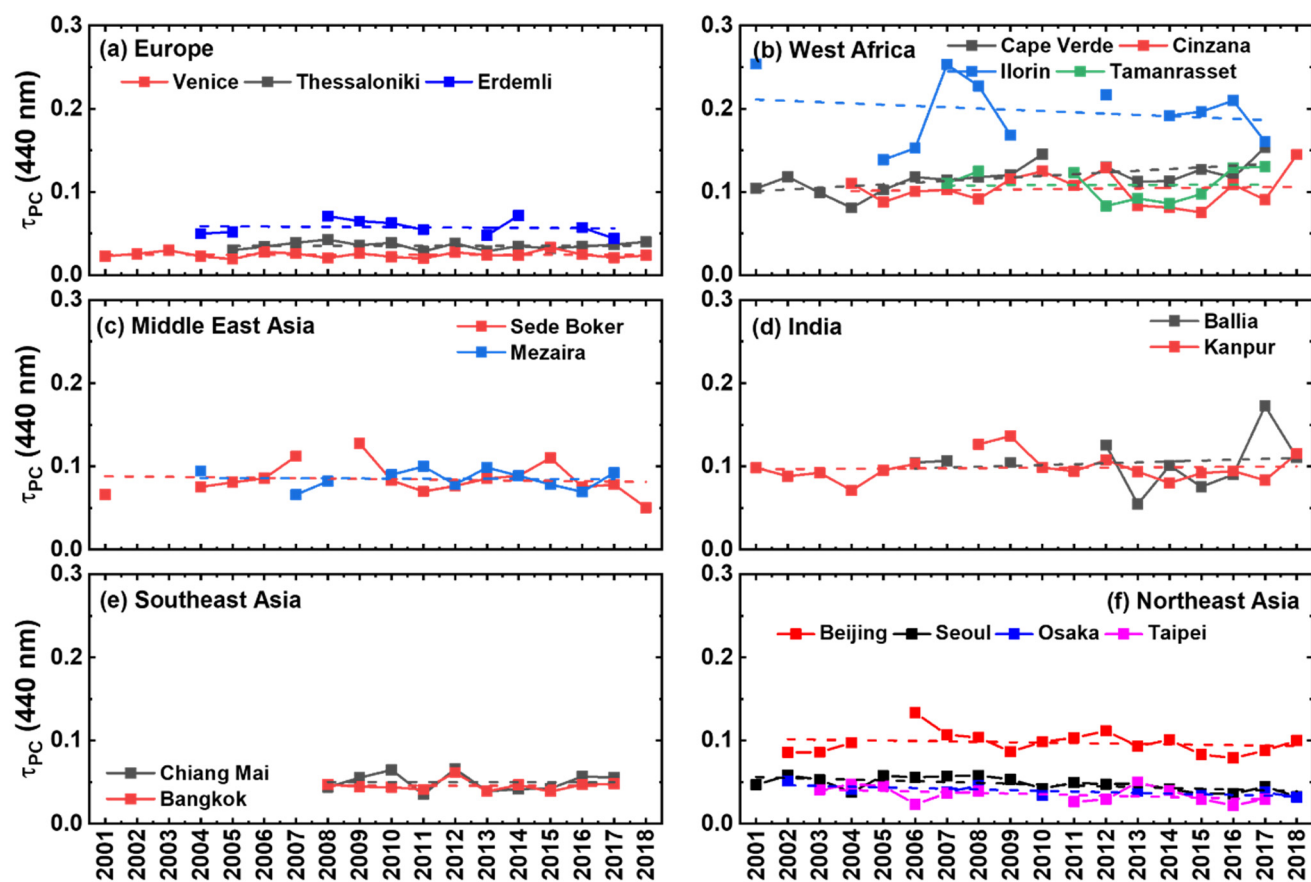

**Figure S5.** Annual trend of fine-mode pollution AOD ( $\tau_{PF}$ ) at wavelength 440 nm for the 17 AERONET sites for the timeframe from 2001–2018. The dashed lines show ordinary least square regression lines.

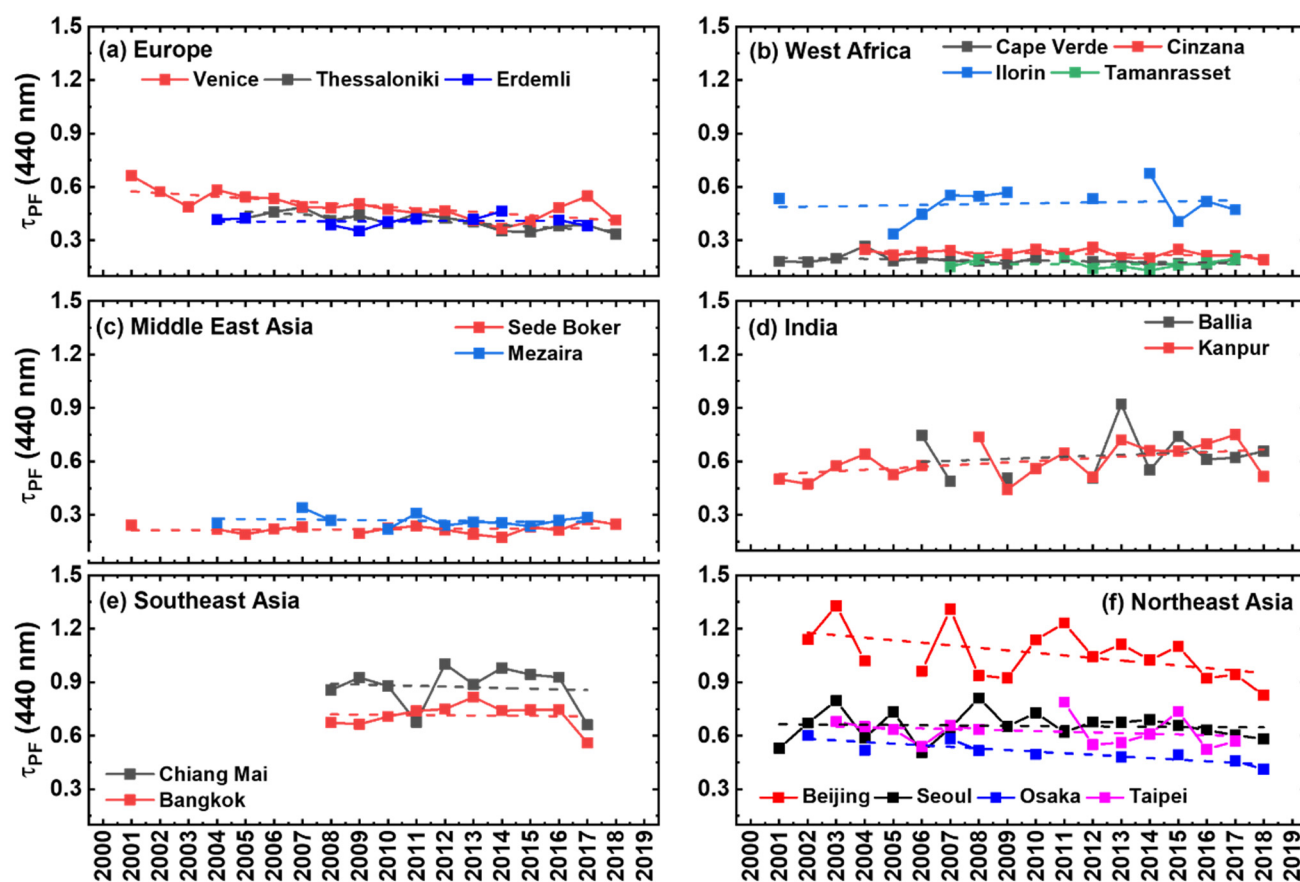

**Figure S6.** Annual trend of the total Ångström exponent ( $\alpha_T$ ) for the wavelength interval 440–870 nm for the 17 AERONET sites for the timeframe from 2001–2018. The dashed lines show ordinary least square regression lines.

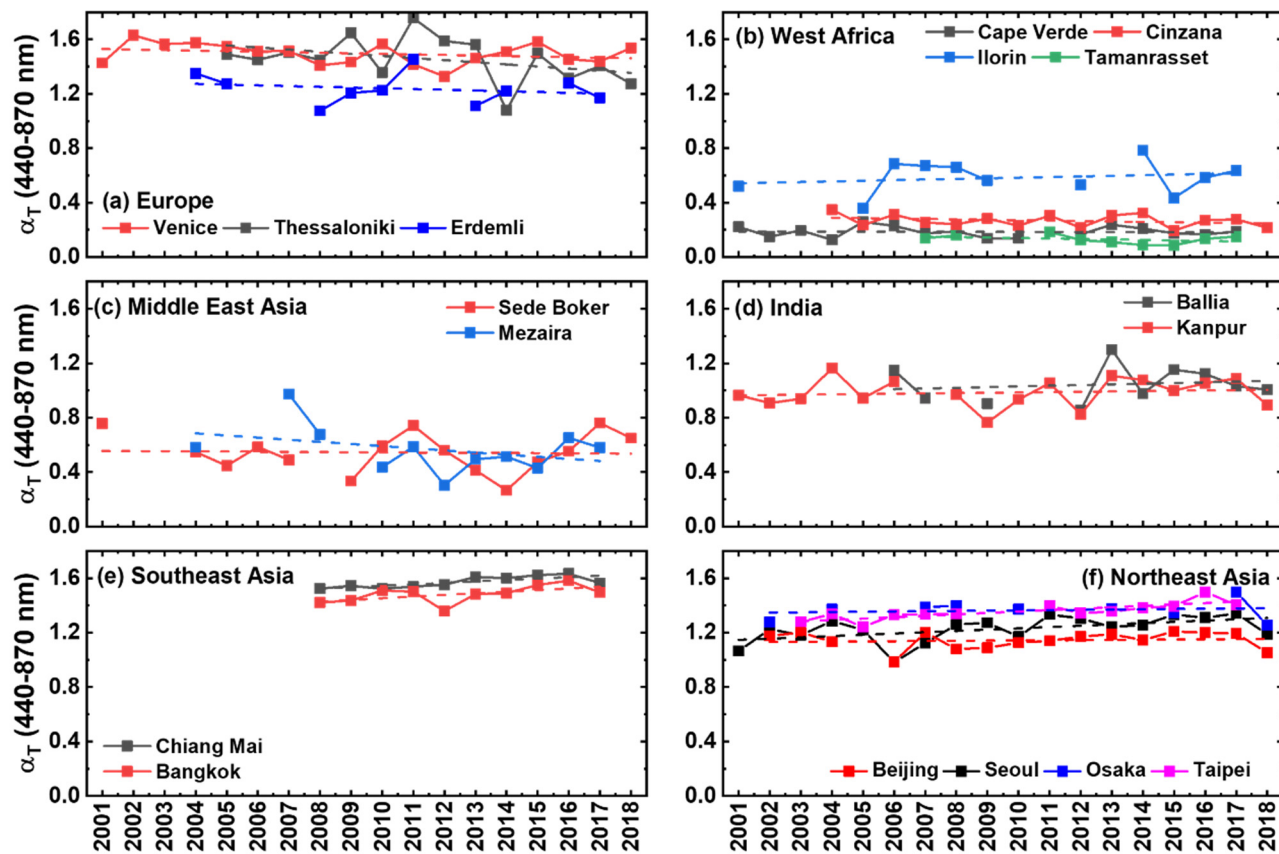

**Figure S7.** Annual trend of the Ångström exponent of fine-mode pollution particles ( $\alpha_{PF}$ ) for the wavelength interval 440–870 nm for the 17 AERONET sites for the timeframe from 2001–2018. The dashed lines show ordinary least square regression lines.

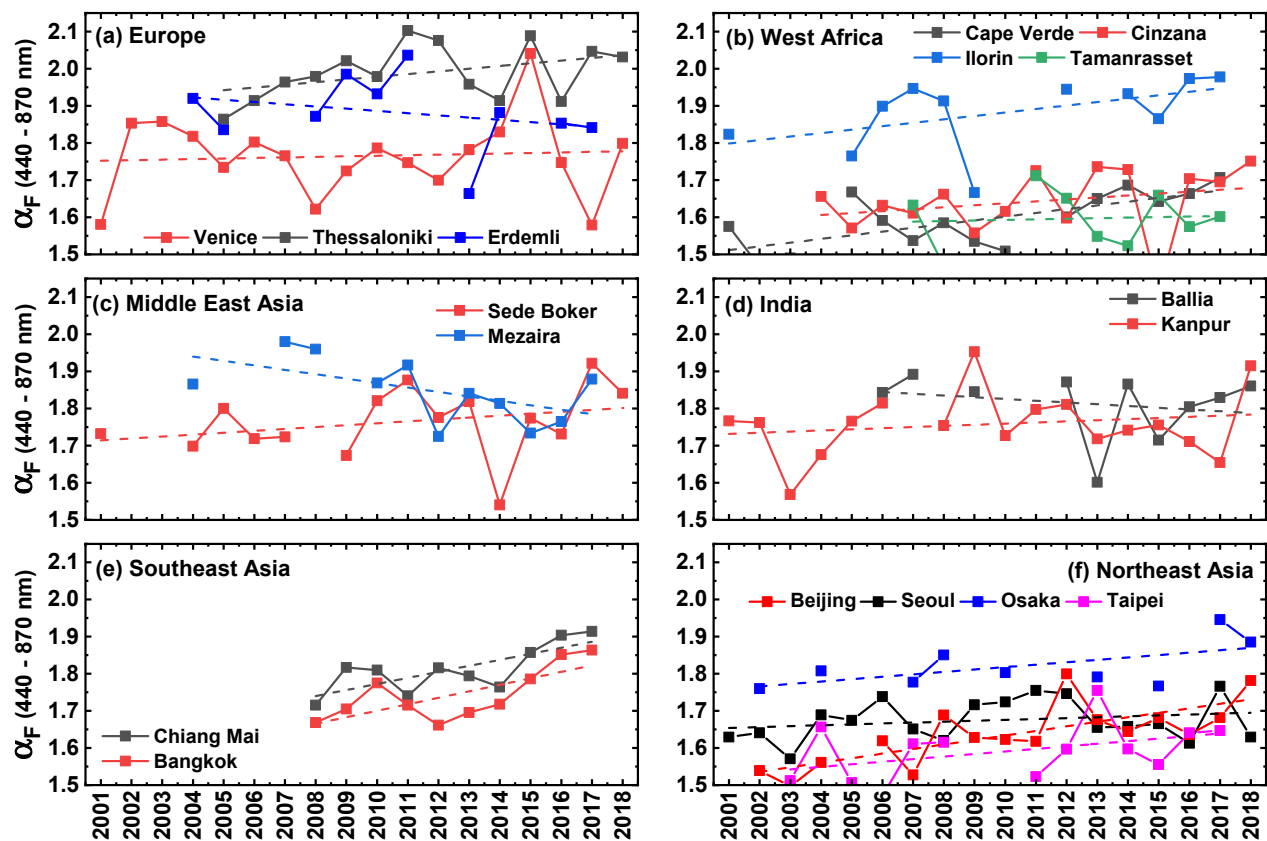

| Region         | Year                            | 01  | 02  | 03 | 04 | 05  | 06  | 07  | 08 | 09  | 10  | 11  | 12  | 13  | 14  | 15  | 16  | 17  | 18  | Total |
|----------------|---------------------------------|-----|-----|----|----|-----|-----|-----|----|-----|-----|-----|-----|-----|-----|-----|-----|-----|-----|-------|
|                | site                            |     |     |    |    |     |     |     |    |     |     |     |     |     |     |     |     |     |     |       |
| Europe         | Thessaloniki (40.63°N, 22.96°E) | -   | -   | -  | -  | 25  | 63  | 31  | 36 | 45  | 42  | 56  | 30  | 34  | 9   | 27  | 24  | 20  | 23  | 465   |
|                | Venice (45.31°N, 12.51°E)       | 16  | 42  | 57 | 42 | 57  | 39  | 38  | 18 | 24  | 29  | 31  | 34  | 18  | 14  | 13  | 18  | 15  | 9   | 514   |
|                | Erdemli (36.56°N, 34.26°E)      | 4   | -   | -  | 43 | 51  | -   | -   | 71 | 41  | 34  | 50  | -   | 13  | 31  | -   | 44  | 18  | -   | 400   |
| North Africa   | Cape Verde (16.73°N, 22.94°W)   | 60  | 34  | 55 | 24 | 53  | 39  | 56  | 50 | 27  | 35  | -   | 40  | 27  | 35  | 43  | 47  | 25  | 13  | 663   |
|                | Cinzana (13.28°N, 5.93°W)       | -   | -   | -  | 55 | 130 | 91  | 120 | 80 | 89  | 114 | 115 | 71  | 78  | 88  | 81  | 62  | 35  | 37  | 1246  |
|                | Ilorin (8.48°N, 4.67°E)         | 50  | -   | -  | -  | 63  | 39  | 99  | 91 | 72  | -   | -   | 93  | -   | 50  | 97  | 97  | 83  | -   | 834   |
|                | Tamanrasset (22.79°N, 5.53°E)   | -   | -   | -  | -  | -   | -   | 38  | 57 | -   | -   | 44  | 39  | 40  | 47  | 36  | 49  | 47  | -   | 397   |
| Middle East    | Sede Boker (30.86°N, 34.78°E)   | 11  | -   | -  | 25 | 19  | 28  | 16  | -  | 14  | 42  | 33  | 31  | 23  | 16  | 33  | 27  | 41  | 26  | 385   |
| East Asia      | Mezaira (23.10°N, 53.75°E)      | -   | -   | -  | 70 | -   | -   | 50  | 35 | -   | 93  | 54  | 57  | 88  | 60  | 71  | 31  | 74  | -   | 683   |
| India          | Ballia (25.87°N, 84.13°E)       | -   | -   | -  | -  | -   | 104 | 62  | -  | 99  | -   | -   | 135 | 27  | 101 | 113 | 91  | 61  | 88  | 881   |
|                | Kanpur (26.51°N, 80.23°E)       | 172 | 144 | 62 | 72 | 198 | 56  | -   | 61 | 123 | 157 | 210 | 150 | 173 | 159 | 178 | 211 | 177 | 120 | 2423  |
| Southeast Asia | Chiang Mai (18.77°N, 98.97°E)   | -   | -   | -  | -  | -   | -   | -   | 82 | 89  | 126 | 72  | 59  | 97  | 85  | 82  | 60  | 57  | -   | 809   |
| Asia           | Bangkok (13.82°N, 100.04°E)     | -   | -   | -  | -  | -   | -   | -   | 91 | 106 | 112 | 77  | 43  | 81  | 76  | 96  | 98  | 57  | -   | 837   |
| Northeast Asia | Beijing (39.98°N, 116.38°E)     | -   | 71  | 81 | 67 | -   | 87  | 60  | 27 | 68  | 96  | 71  | 42  | 40  | 71  | 56  | 73  | 46  | 63  | 1019  |
|                | Seoul (37.46°N, 126.95°E)       | 68  | 43  | 50 | 80 | 45  | 33  | 58  | 18 | 55  | 9   | 94  | 88  | 82  | 88  | 75  | 51  | 50  | 76  | 1063  |
|                | Osaka (34.65°N, 135.59°E)       | -   | 21  | -  | 39 | -   | -   | 39  | 32 | -   | 32  | -   | -   | 46  | -   | 36  | -   | 21  | 26  | 292   |
|                | Taipei (25.02°N, 121.54°E)      | -   | 7   | 25 | 15 | 27  | 8   | 47  | -  | -   | 14  | 18  | 12  | 17  | 26  | 37  | 13  | 23  | -   | 289   |

**Table S1. Number of observation days in each year for the 17 AERONET Sun/sky radiometer sites (version 3 level 2.0 data)**
